# Supplementary material
Source: MDPI journal article supplement (https://www.mdpi.com/2073-4441/5/2/798)
Supplement: s1 [file s1]

Supplementary Information

Questionnaire on DSS Tool Applications in Developing Countries

**
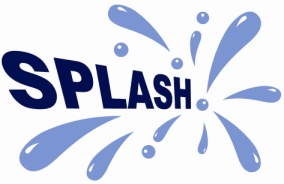
**

The Splash Era-Net Project (Coordinating European Water Research for Poverty Reduction; http://www.splash-era.net/), is developing a concept note on “Using modern decision support systems for evidence based policy making in IWRM in developing countries”.

This questionnaire is aimed at collecting **primary information from DSS experts with specific experiences in Integrated Water Resources Management (IWRM) tools in developing countries**. The primary interest is for applications in the African continent.

Respondents are asked to contribute with their expertise with reference to a study case they were recently involved in. The main aim of this consultation is to contribute to consolidate the information about the state of the art of recent IWRM-DSS developments and implementations already acquired from refereed and grey literature, and collect the opinions of experienced researchers about the current situation and on future research and funding needs.

All the answers to the questions are open in order to let the respondents have the maximum freedom to provide what they consider being the most important messages to deliver to the Splash Project, *i.e*., 16 ministries, funding agencies and national research and technological development authorities from 11 European countries, and our donor, the European Commission.

**(a) The respondent and the IWRM-DSS case**

Name of respondent:

Institution/Organisation:

Area of expertise:

DSS project(s) considered for answering this questionnaire and web site(s):

Role in the project(s):

Other relevant information (title, duration, brief description, decision/policy/planning context, published
materials, *etc*.):

Grant provided by:

Other relevant actors:

**(b) Opportunities and barriers experienced in using IWRM-DSS for policy/decision making**

What were the main strengths of the DSS developed/implemented?

What were main weaknesses of the DSS developed/implemented?

What the directions for overcoming the problems experienced?

What the medium/long term perspectives of the DSS in the case or elsewhere?

**(c) Guidelines for DSS development and implementation for IWRM**

Giupponi *et al*. (2011) proposed a series of recommendations for DSS development, reported in the box below. What are your reactions and suggestions?

**Phase A: before the development or acquisition of a DSS tool**

1. Investigate and describe the problem at hand, the resources available and the data issue
2. Identify the actors involved in the decision and explore the social context
3. Understand the institutional and normative context
4. Identify possible constraints
5. Arouse users’ interest and initial commitment
6. Identify and clearly communicate reasonable expectations
7. Decide whether or not a DSS may be useful for the purposes of the case

**Phase B: the development of the DSS tool, or acquisition/adaptation of existing ones**

1. Involve end users in the DSS development throughout the process
2. Define a clear strategy and work programme and include quality assurance
3. Adapt tools to the users’ needs and not vice-versa
4. Refine users’ requirements during the development phase
5. Assure flexibility
6. Accurately manage and communicate uncertainty

**Phase C: DSS implementation and application in the decision case**

1. Provide a coherent methodological framework in which the DSS tool should operate
2. Provide effective documentation of the limitations of the results provided
3. Provide adequate documentation and support materials all together with the DSS tool
4. Train users
5. Exploit the full potential of the tool in supporting the whole process
6. Provide the basis for maintenance and further development
7. Adopt strategies for dissemination and technology transfer

Would you like to point out what the most critical issues are for more effective IWRM-DSS tools?

Are you aware of any relevant reference guidelines specific for developing countries or Africa?

**(d) Proposed roadmap for the promotion, application and improvement of IWRM-DSS**

What are in your opinion the current perspectives for IWRM-DSS use in developing countries?

What the main constrains to wider use of IWRM-DSS?

What are the most urgent needs for future research in this field?

Besides innovative research, what do you think are the directions we should invest to promote DSS use
and what their relevance as compared to innovative research?

What do you think are the most important actors for increasing the impact of DSS tools in IWRM?

What the main issues for knowledge exchange, training and capacity building?

(**e) Any other suggestion?**

Would you be available for a Skype call in case?

Can we mention your name as respondent to this questionnaire in the report to be published or do you
prefer anonymity?

**Reference**

1. Giupponi, C.; Mysiak, J.; Depietri, Y.; Tamaro, M. Decision Support Systems for Water Resources Management: Current State and Guidelines for Tool Development. In *Decision Support for Water Framework Directive Implementation*; Vanrolleghem, P.A., Ed.; IWA Publishing: London, UK, 2011; pp. 107–202.

© 2013 by the authors; licensee MDPI, Basel, Switzerland. This article is an open access article distributed under the terms and conditions of the Creative Commons Attribution license (http://creativecommons.org/licenses/by/3.0/).
